# Supplementary material
Source: publisher figshare collection journal article supplement (https://acs.figshare.com/ndownloader/files/25660219)
Supplement: Supplementary file 1 [file 25660219]

## **Supplementary Information**

### **A Systematic Strategy for the Metabolites of Amentoflavone *in Vivo* and *in Vitro* Based on UHPLC-Q-TOF-MS/MS Analysis**

Baolin Wang<sup>a,b</sup>, Yimeng Lu<sup>a</sup>, Xiaolong Hu<sup>a</sup>, Jiahao Feng<sup>a</sup>, Wei Shen<sup>a</sup>, Rong Wang<sup>a</sup>,  
Hao Wang<sup>a,□</sup>

<sup>a</sup> State Key Laboratory of Natural Medicines, Department of TCM Pharmaceuticals,  
School of Traditional Chinese Pharmacy, China Pharmaceutical University, Nanjing  
210009, People's Republic of China

<sup>b</sup> Nanchang Key Laboratory of Quality Control and Safety Evaluation of TCM,  
Nanchang Institute for Food and Drug Control, Nanchang 330012, People's Republic  
of China

\*Corresponding author

Tel: +86-025-83271328; Fax: +86-025-83271328; Email: wanghao@cpu.edu.cn (H.  
Wang).

### **Supplementary Figure Captions**

|                                                                    |    |
|--------------------------------------------------------------------|----|
| <b>Supplementary Figure 1-1:</b> The MS/MS spectra of M1-6 -----   | 3  |
| <b>Supplementary Figure 1-2:</b> The MS/MS spectra of M7-12 -----  | 4  |
| <b>Supplementary Figure 1-3:</b> The MS/MS spectra of M13-17 ----- | 5  |
| <b>Supplementary Figure 1-4:</b> The MS/MS spectra of M18-22 ----- | 6  |
| <b>Supplementary Figure 1-5:</b> The MS/MS spectra of M23-28 ----- | 7  |
| <b>Supplementary Figure 1-6:</b> The MS/MS spectra of M29-34 ----- | 8  |
| <b>Supplementary Figure 1-7:</b> The MS/MS spectra of M35-40 ----- | 9  |
| <b>Supplementary Figure 1-8:</b> The MS/MS spectra of M41-43 ----- | 10 |

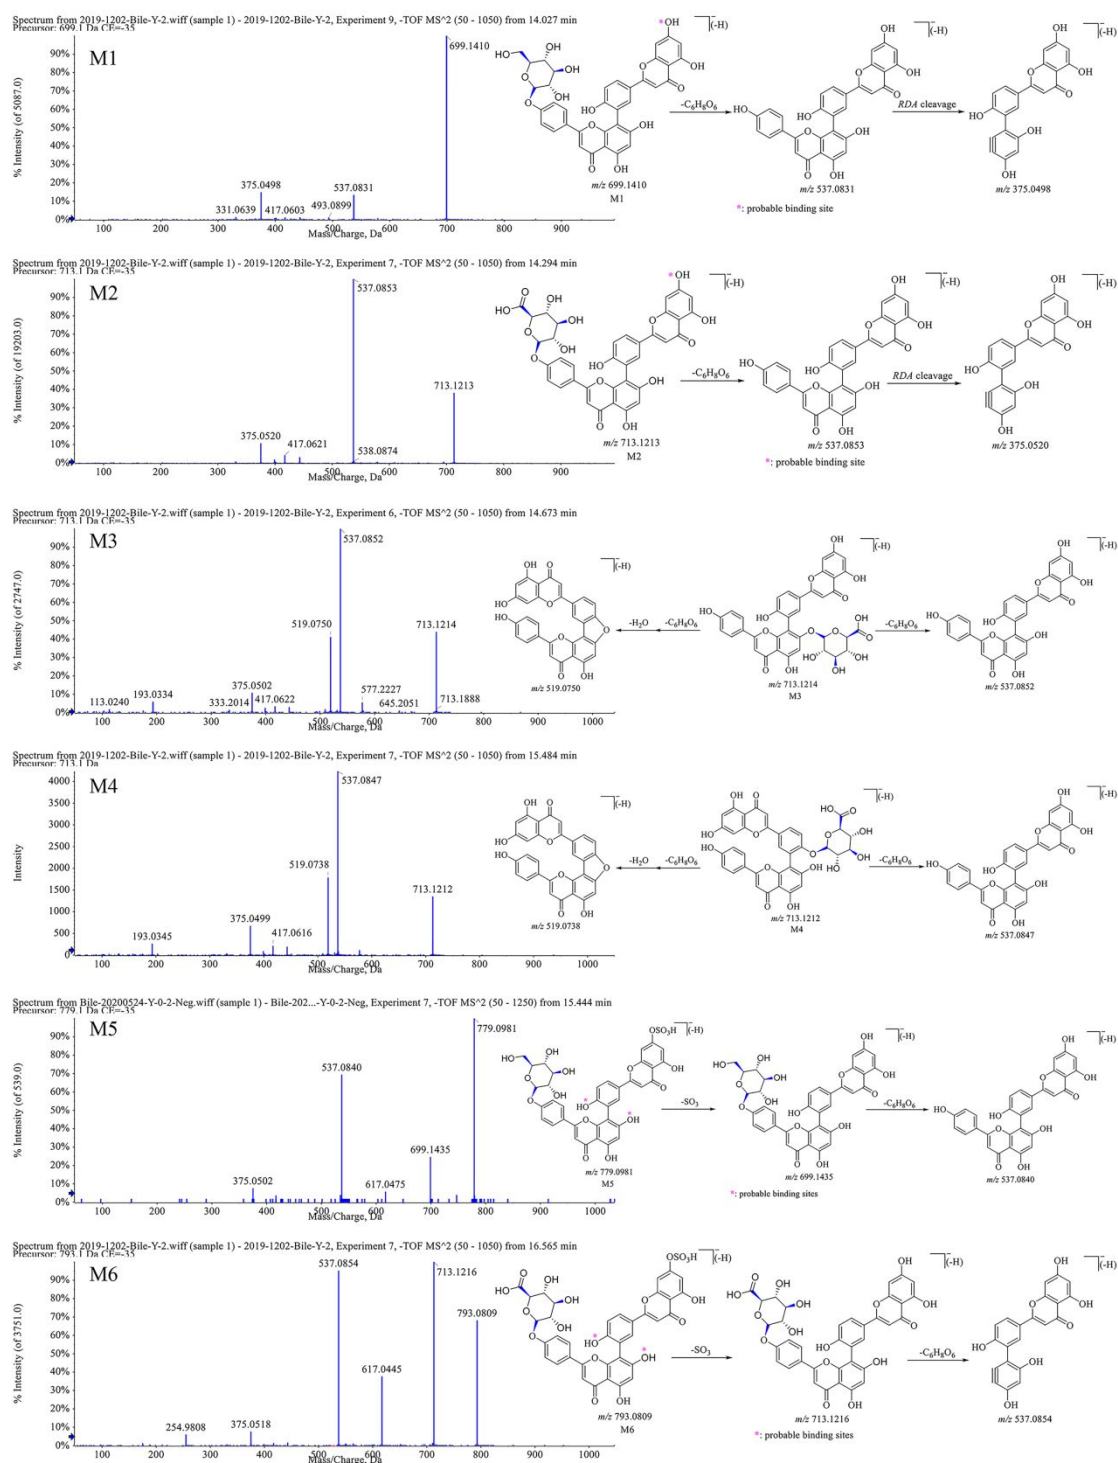

**Supplementary Figure 1-1**

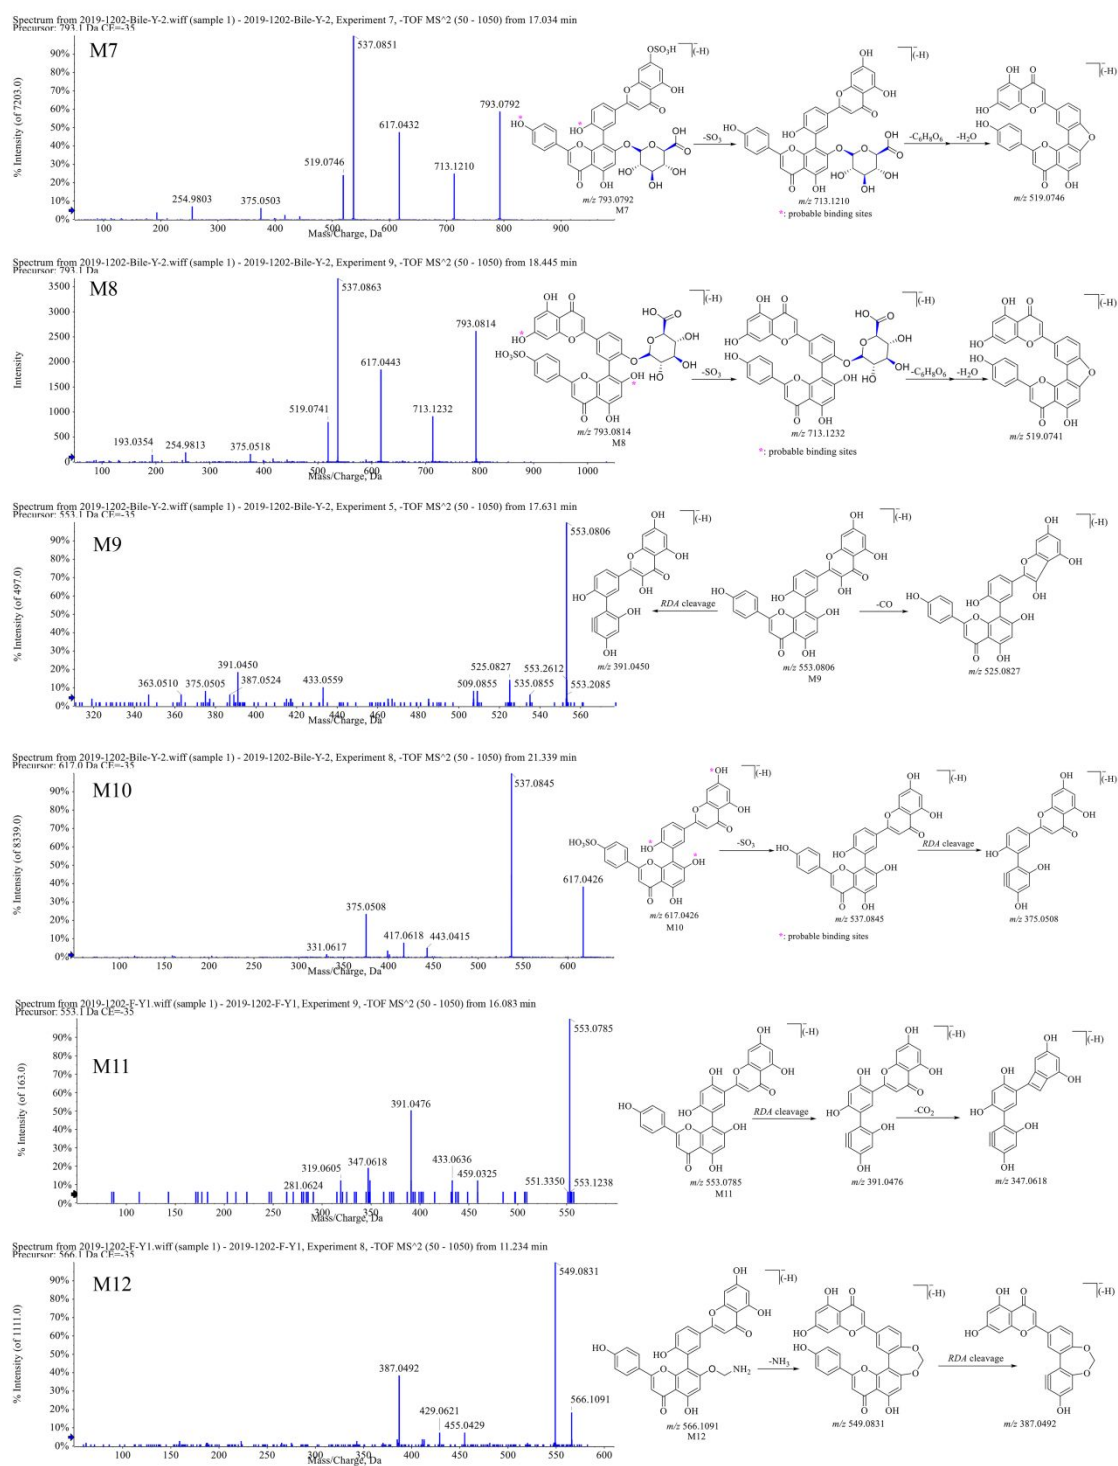

**Supplementary Figure 1-2**

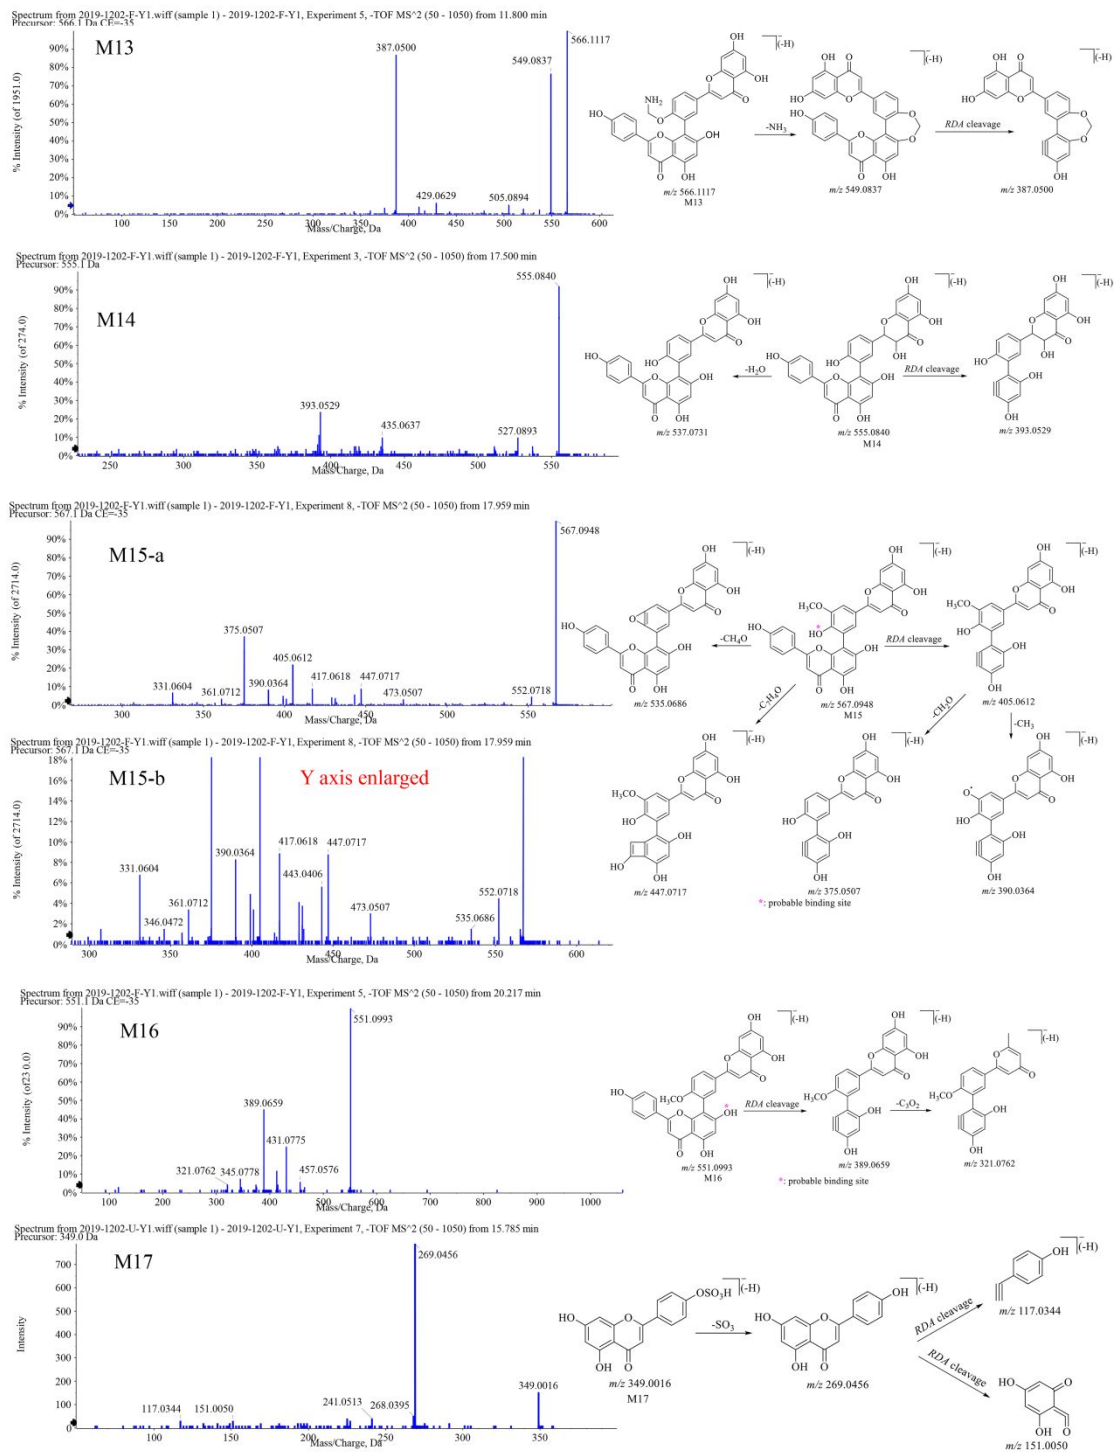

**Supplementary Figure 1-3**

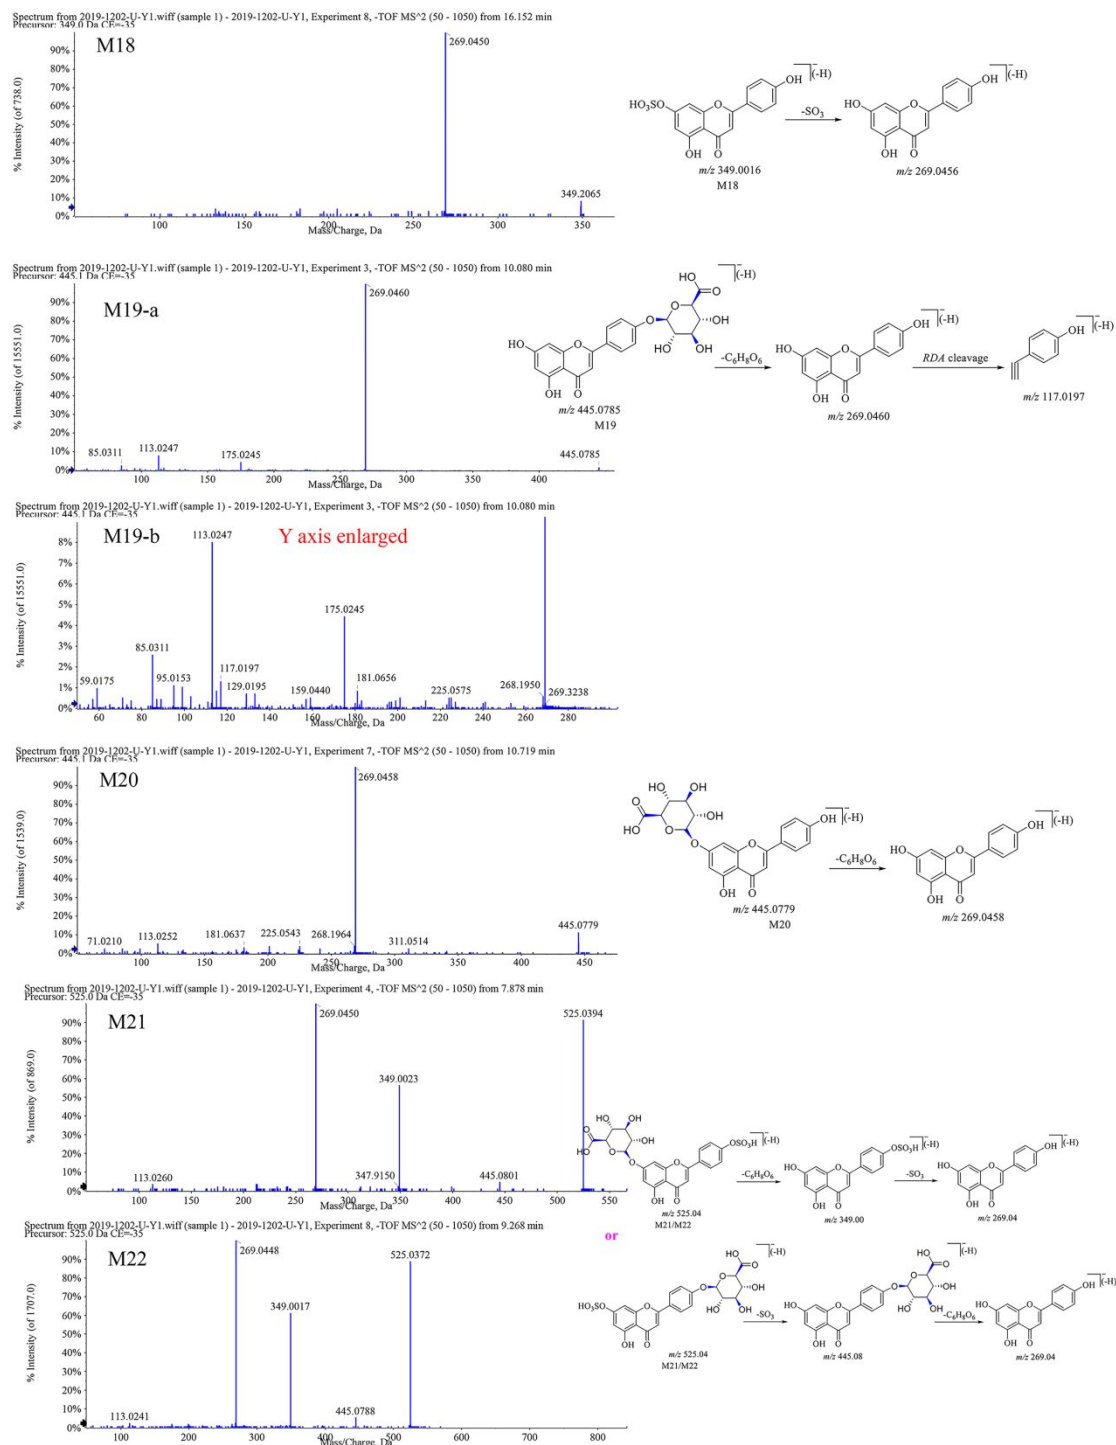

Supplementary Figure 1-4

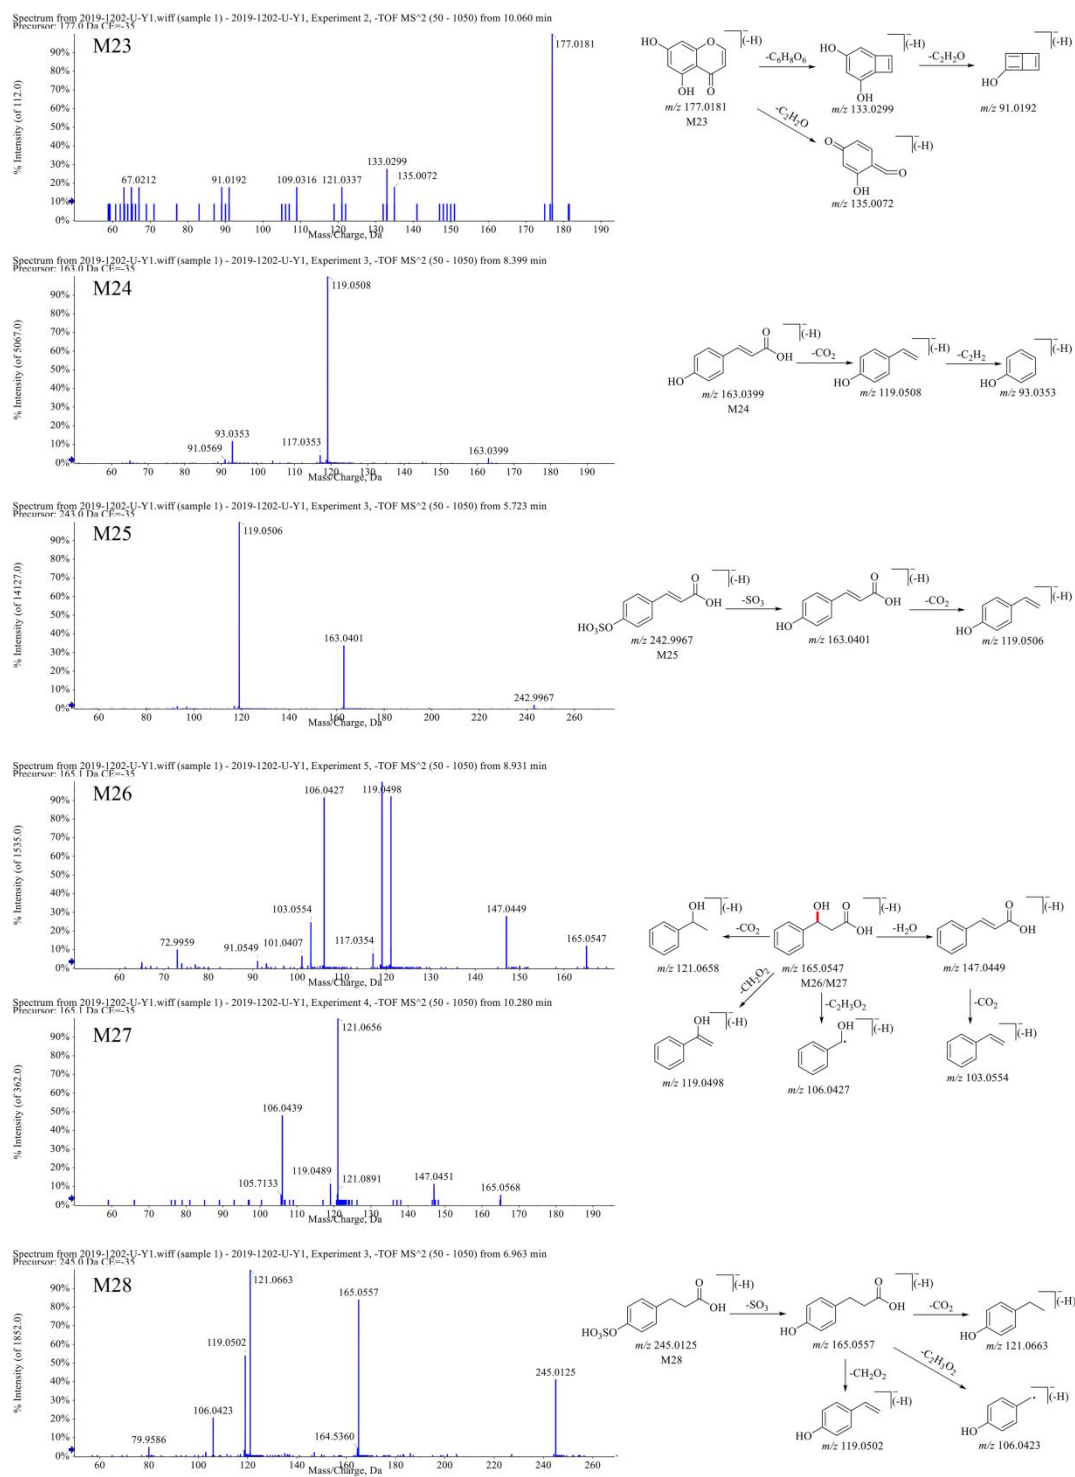

**Supplementary Figure 1-5**



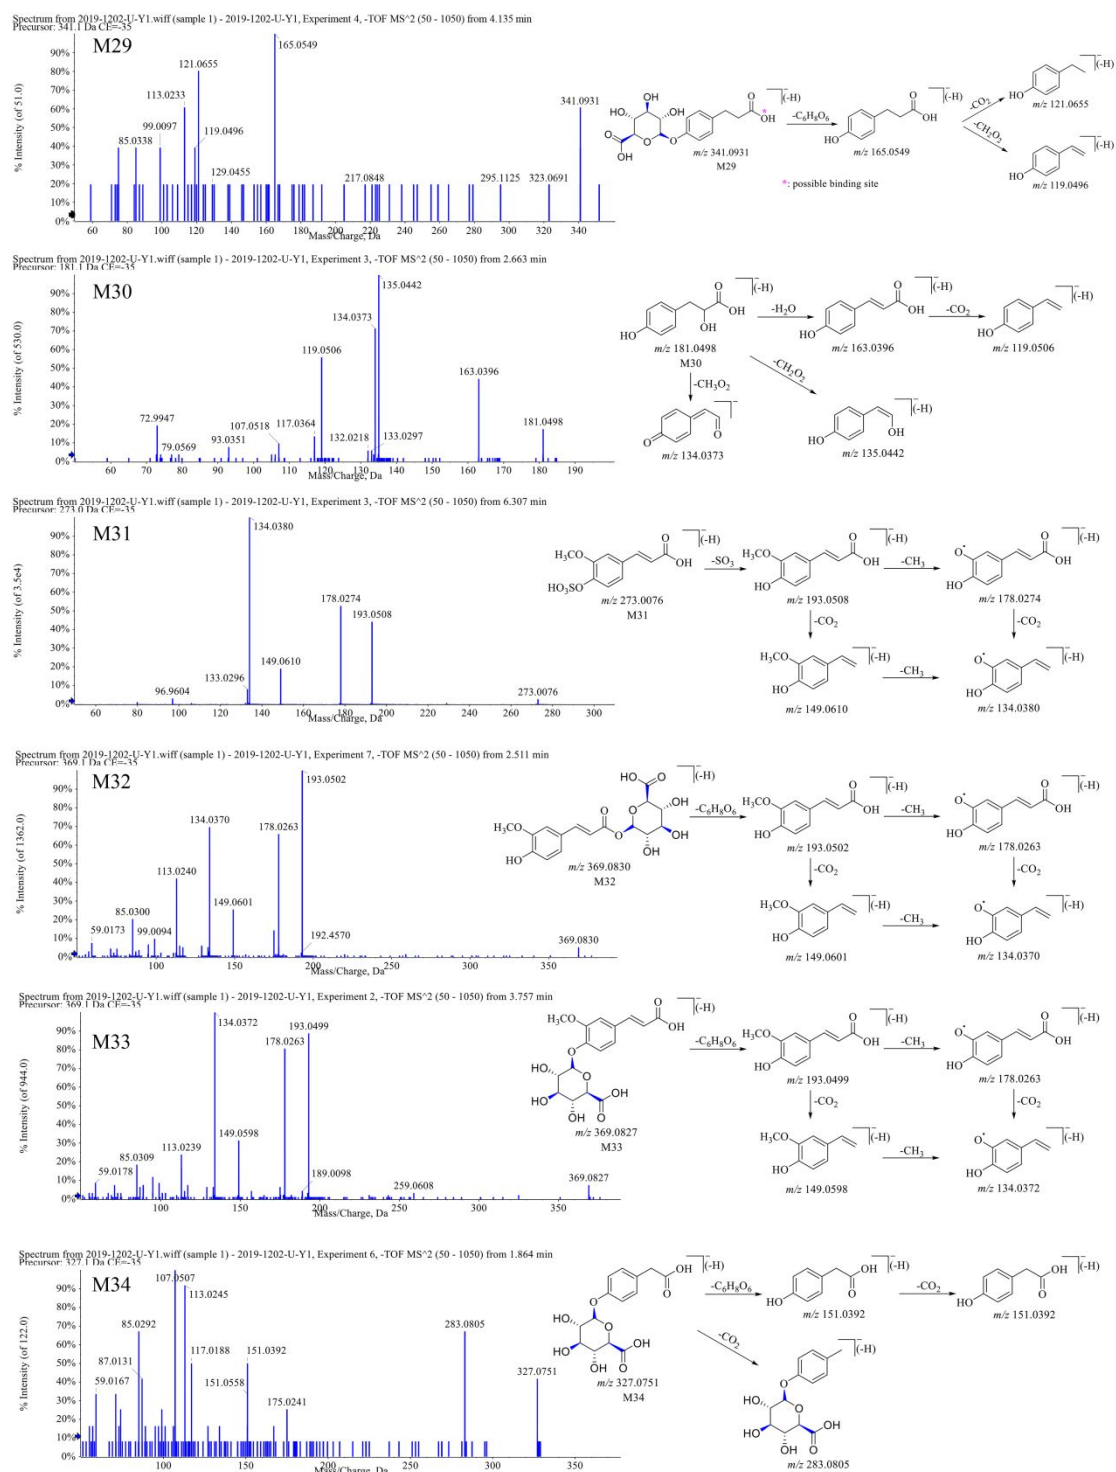

**Supplementary Figure 1-6**



Spectrum from 2019-1202-U-Y1.wiff (sample 1) - 2019-1202-U-Y1, Experiment 3, -TOF MS<sup>2</sup> (50 - 1050) from 11.613 min  
Precursor: 137.0 Da C<sub>7</sub>H<sub>5</sub>O<sub>3</sub>

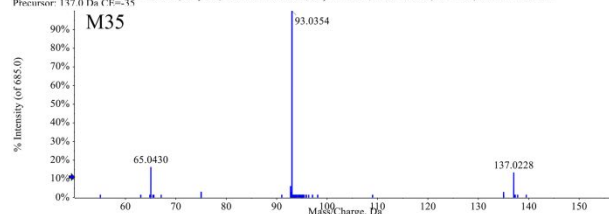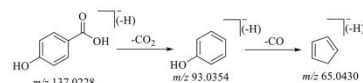

Spectrum from 2019-1202-U-Y1.wiff (sample 1) - 2019-1202-U-Y1, Experiment 4, -TOF MS<sup>2</sup> (50 - 1050) from 2.933 min  
Precursor: 216.9 Da C<sub>7</sub>H<sub>5</sub>O<sub>4</sub>S

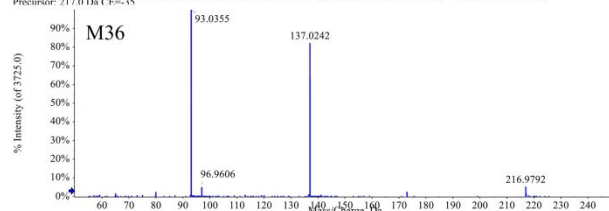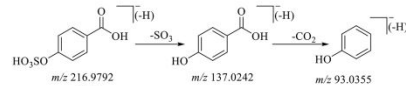

Spectrum from 2019-1202-U-Y1.wiff (sample 1) - 2019-1202-U-Y1, Experiment 5, -TOF MS<sup>2</sup> (50 - 1050) from 3.305 min  
Precursor: 246.9 Da C<sub>9</sub>H<sub>7</sub>O<sub>5</sub>S

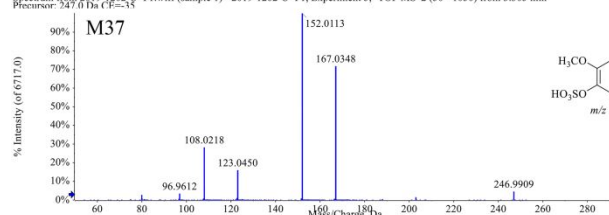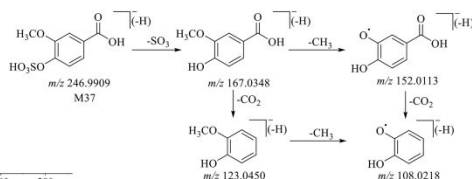

Spectrum from 2019-1202-U-Y1.wiff (sample 1) - 2019-1202-U-Y1, Experiment 3, -TOF MS<sup>2</sup> (50 - 1050) from 8.622 min  
Precursor: 194.0 Da C<sub>8</sub>H<sub>7</sub>O<sub>3</sub>N

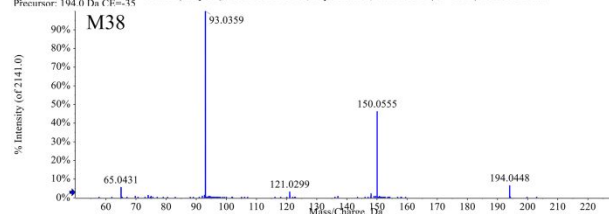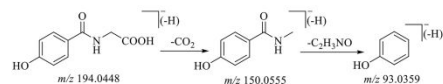

Spectrum from 2019-1202-U-Y1.wiff (sample 1) - 2019-1202-U-Y1, Experiment 4, -TOF MS<sup>2</sup> (50 - 1050) from 5.744 min  
Precursor: 178.0 Da C<sub>8</sub>H<sub>7</sub>O<sub>3</sub>N

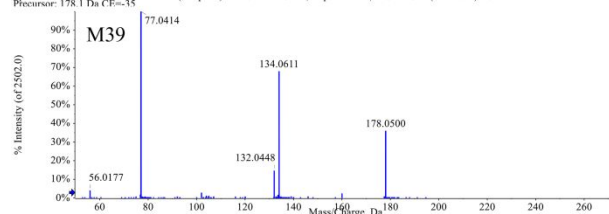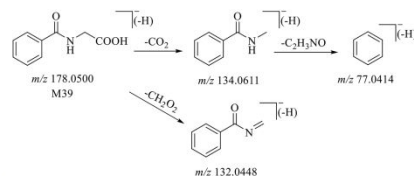

Spectrum from 2019-1202-Liver-I-Y1.wiff (sample 1) - 2019-1202-Liver-I-Y1, Experiment 5, -TOF MS<sup>2</sup> (50 - 1050) from 15.285 min  
Precursor: 553.0 Da C<sub>21</sub>H<sub>15</sub>O<sub>10</sub>

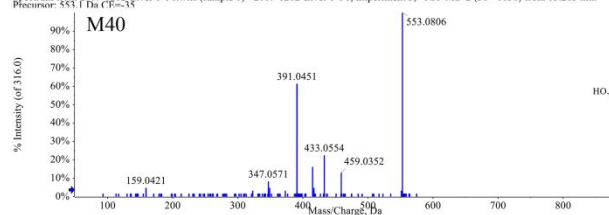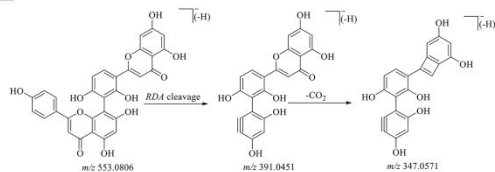

**Supplementary Figure 1-7**

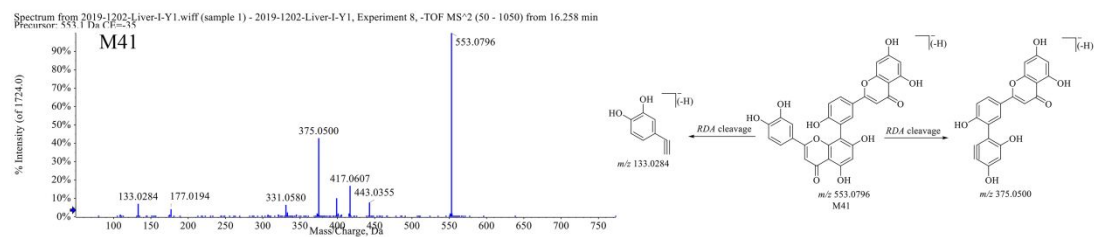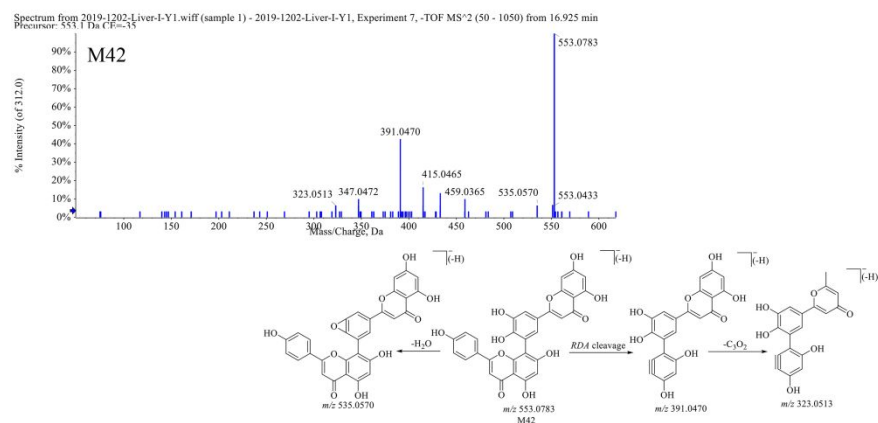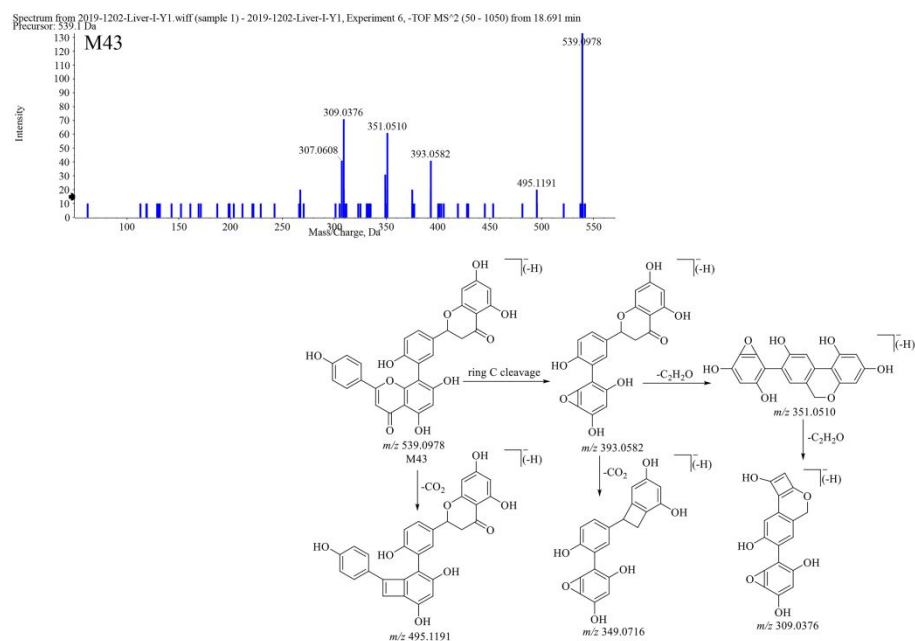

**Supplementary Figure 1-8**
